# Supplementary material for: 79 知多工場 70t 電炉工場の設備について(転炉, 平炉, 電気炉, 日本鉄鋼協会第 66 回(秋季)講演大会講演大要)
Source: Royal Society of Chemistry journal article supplement (doi:10.1039/c4cc06536k), 1963-09-01
Supplement: c4cc06536k1.pdf [file c4cc06536k1.pdf]

## **Supporting Information for**

### **Salt-Enabled Visual Detection of DNA**

Xilong Wang, Xun Chen, Sha Sun, Feifei Zhang, and Jin Zhu\*

Department of Polymer Science and Engineering, School of Chemistry and Chemical Engineering, State Key Laboratory of Coordination Chemistry, Nanjing National Laboratory of Microstructures, Nanjing University, Nanjing 210093, China

\*Corresponding author. Phone: +86-25-83686291; Fax: +86-25-83317761; E-mail: jinz@nju.edu.cn.

## **Table of Contents**

|                                                                                                 |                |
|-------------------------------------------------------------------------------------------------|----------------|
| <b>1. Materials, facilities, and measurements.....</b>                                          | <b>S3-S4</b>   |
| <b>2. DNA and RNA sequence information .....</b>                                                | <b>S5-S11</b>  |
| <b>3. Preparation of self-assembled DNA nanostructure .....</b>                                 | <b>S12-S16</b> |
| <b>4. Stability of Cuboid1 .....</b>                                                            | <b>S17-S18</b> |
| <b>5. Preparation of DNA-modified glass slide .....</b>                                         | <b>S19</b>     |
| <b>6. Detection of DNA1 with Cuboid1 .....</b>                                                  | <b>S20</b>     |
| <b>7. Contact angle measurement.....</b>                                                        | <b>S21</b>     |
| <b>8. Attempted detection of DNA1 with Probe1A or Probe1B mixture<br/>.....</b>                 | <b>S22-S23</b> |
| <b>9. Differentiation of DNA1 from DNA strands with single-base<br/>mismatches.....</b>         | <b>S24</b>     |
| <b>10. Two-target detection .....</b>                                                           | <b>S25</b>     |
| <b>11. RNA detection.....</b>                                                                   | <b>S26</b>     |
| <b>12. DNA detection through LCR-rolling circle amplification (LCR-<br/>RCA) protocol .....</b> | <b>S27-S29</b> |
| <b>13. References .....</b>                                                                     | <b>S30</b>     |

## 1. Materials, facilities, and measurements

Hydrogen peroxide (30 wt%, AR grade) was purchased from Yonghua Chemical Technology (Jiangsu) Co. Ltd. Concentrated sulfuric acid (95-98%), hydrochloric acid (36-38 wt%), ethylenediaminetetraacetic acid disodium salt dihydrate (EDTA, 99.0%), boric acid (99.5%), and ammonia solution (25-28 wt%) were purchased from Nanjing Chemical Reagent Co. Ltd. 3-(2-Aminoethylamino)propyltrimethoxysilane (EDAS, 96%), hexanoic anhydride (HA, 98%), sodium dihydrogen phosphate dehydrate (99%), sodium hydrogen phosphate (anhydrous, 99.0%), and sodium chloride (99%) were purchased from Alfa Aesar. Ethanol (99.7%) was from Shanghai Titanchem Co. Ltd. Succinimidyl 4-(*N*-maleimidomethyl)cyclohexane-1-carboxylate (SMCC, 98% HPLC) was purchased from Meyer Chemical Technology Co. Ltd. Glacial acetic acid (99.8%) was from Acros Organics. 1-Hexanethiol (HT, 96%) was from Adamas-beta. Tris(hydroxymethyl)aminomethane (Tris, 99.8%) was purchased from Nanjing Biosky Sci. & Tech. Co. Ltd. NaNO<sub>3</sub> (96%) was from Xilong Chemical Co. Ltd. Magnesium chloride hexahydrate (99.0%) was purchased from Sigma. Sodium dodecyl sulfate (CP, SDS), dimethyl sulfoxide (DMSO, 99.0%), pyridine (99.5%), and *N,N'*-dimethylformamide (DMF, 99.5%) were obtained from Sinopharm Chemical Reagent Co. Ltd. DMSO, pyridine, and DMF were distilled over CaH<sub>2</sub> prior to use, and other reagents were used as received. *Taq* DNA ligase was from New England Biolabs.  $\phi$ 29 DNA polymerase was from Thermo Scientific. *E. coli*. Exonuclease I, *E. coli*. exonuclease III, dNTPs (10mM), DL2000 DNA marker, and 20 bp DNA ladder marker were purchased from Takara Biotechnology (Dalian) Co. Ltd. Diethylpyrocarbonate (DEPC) and ethidium bromide were purchased from Sangon Biotech (Shanghai) Co. Ltd. Freeze 'N Squeeze column was purchased from Bio-Rad Laboratories, Inc. Nano-pure water (18.2 M $\Omega$ •cm), purified by Sartorius Arium 611 system, was used throughout the experiment.

All the DNA molecules (Tables S1 and S3-S5) were custom-synthesized by Sangon Biotech (Shanghai) Co. Ltd. RNA (Table S2) was custom-synthesized by Takara Biotechnology (Dalian) Co. Ltd.

Ligase chain reaction (LCR) and the preparation of self-assembled DNA nanostructure were performed on a GeneAmp PCR system 9700 from Applied Biosystems. Contact angle measurement was performed on a KSV CAM200 optical contact angle meter. Gel electrophoresis was performed on a Bio-Rad system using 2% agarose gel or 20% polyacrylamide. Photographs were taken using Canon DIGITAL IXUS 950IS digital camera.

## 2. DNA and RNA sequence information

**Tables S1.** DNA symbol and sequence information

| Description of DNA | Sequence <sup>a</sup>                                                         |
|--------------------|-------------------------------------------------------------------------------|
| <b>Capture1</b>    | 5'-ATTTAACAATAATCCTTTTTTTTTT-SH-3'                                            |
| <b>DNA1</b>        | 5'-GGATTATTGTTAAATATTGATAAGGAT-3'                                             |
| <b>Probe1</b>      | 5'-TTTTTTTTTTATCCTTATCAAT-3'                                                  |
| <b>Probe1A</b>     | 5'-ATCCTTATCAAT-3'                                                            |
| <b>DNA1-SBM1</b>   | 5'-GGATTATCGTTAAATATTGATAAGGAT-3'                                             |
| <b>DNA1-SBM2</b>   | 5'-GGATTATTATTAAATATTGATAAGGAT-3'                                             |
| <b>DNA1-SBM3</b>   | 5'-GGATTATTCGTTAAATATTGATAAGGAT-3'                                            |
| <b>DNA1-SBM4</b>   | 5'-GGATTATGTTAAATATTGATAAGGAT-3'                                              |
| <b>Capture2</b>    | 5'-TATCATACTAACATATTTTTTTTTT-SH-3'                                            |
| <b>DNA2</b>        | 5'-TATGTTAGTATGATATAGGAATAGTTA-3'                                             |
| <b>Probe2</b>      | 5'-TTTTTTTTTTTAACTATTCCTA-3'                                                  |
| <b>RCA1</b>        | 5'-HS-AAAAAAAAAATCATCGAGGAAGTGGCAGTC-3'                                       |
| <b>PDNA1</b>       | 5'-(P)-TTAACAATAATGGTCTGCCCTGACTGCCAC<br>TTCCTCGATGATCCTCGATGTCCTTATCAATAT-3' |
| <b>AMPDNA1A</b>    | 5'-ATTATTGTTAA-3'                                                             |
| <b>AMPDNA1B</b>    | 5'-(P)-ATATTGATAAGG-3'                                                        |

<sup>a</sup> (P) denotes the presence of a phosphate group.

**Tables S2.** RNA symbol and sequence information

| Description of RNA | Sequence                            |
|--------------------|-------------------------------------|
| <b>RNA1</b>        | 5'-GGAUUAUUGUUAUAAUUAUUGAUAAGGAU-3' |

**Tables S3.** DNA sequences for making **Cuboid1** and **Cuboid2**

| DNA strand | Sequence (5'→3')                                        |
|------------|---------------------------------------------------------|
| 1          | CATAATACTTTTTTTTTTTTTTTTTTTGGCTAGTAGATTGTTTGG<br>AGTCAG |
| 2          | GCCCTTCCTTTTTTTTTTTTTTTTTTTGGAGACCAAAGAATGTT<br>GAGCAGG |
| 3          | CCCGCCCCTTTTTTTTTTTTTTTTTTTGGGGACCGCGAGATATA<br>AGACGTA |
| 4          | CTCCGGCCTTCTGATCCCCGCTGCCTGCCACCGAGCGCTG<br>AGAACCGT    |
| 5          | TACTACGTTCCCTCAACGGCTTACGCTCCGCAGTCGTGGC<br>ATTACGAT    |
| 6          | CAATTCTCAATATCCATAAATACCACATCCCGGCTGAGCC<br>GAGACGTG    |
| 7          | TGATTCCGCCACAAACGGCTGCAAGTAGCAAGATGCTGA<br>GTGCCGTAT    |
| 8          | TTCACAACCTAAGACCGTAGACGTTAGGCGAAAAGTCGA<br>AAAAAATGA    |
| 9          | TAAACCTCGGGCCCCGGGCAGCTGGCGGCGAACGGGA<br>GTCCGGCGAT     |
| 10         | GCGGCCACAAATTTCCAGCATTCTTTTTTTTTTTTTTTTG<br>GAACTTA     |
| 11         | ATTTAGCCCGGAGCCCTGTGCTCCTTTTTTTTTTTTTTTTG<br>GTATTGT    |
| 12         | TTAGAACTCCGATACCCGATATCCTTTTTTTTTTTTTTTTG<br>GGTCCGG    |
| 13         | CAGCCTTTCCTGTATAATGGCTAAGGGGCCAAAGGATCGT<br>GAGGTCAT    |
| 14         | TACGCCTATTCCAAATGTTCTGAGGGCCGGTGAAATGTGA<br>GGCATAAA    |
| 15         | CCTACCGACTCATAATTGGCAATAAGTTAAAAGCGGCGGG<br>GTCTAGGA    |
| 16         | TTTTTTTTTCACCCAGTGCCCTATGCCCTTGATGGGGCGCT<br>GCAGGATG   |
| 17         | TTTTTTTTTATACCATACAACTCATGTTTCCTACGCAGGGAG<br>AGTAGAA   |
| 18         | TTTTTTTTTCCGCGGCTCCCAGCCCACTGACCCAGCTAAGC<br>CAGGTCAG   |
| 19         | CCATGCGTCCTACAGCCTGCGACCTACGACCTGTATTCAG<br>GAACTCAG    |
| 20         | CACCGCGCGCTTTATACACTTTACTTTTTTACAACGGGCTT<br>GGGACCA    |
| 21         | CCACTATTTTCGGTCACCTGAACCTTAAGTCCGCACGGGG<br>AACACGAT    |

22 AAACAATCTACTAGCCGGAGTACAGGTGGCAGGCAGCGG  
 GGATCAGAA  
 23 TATTGCCATACGTCTTATATCTCGCGGTCCCCGGGTTCGCG  
 GGGATGT  
 24 TGTCACATCACGTCTCTGCCAGGGATTATGAGTCGGTAGG  
 CGGTGATT  
 25 AGCGCCCCGTACTACATACATCCTACGGTTCTGACGGTAC  
 TATACAGG  
 26 TTAATTCCCTTGCTCCGGGTGAATTGCGGGGCACCCAAG  
 GACAGCGGA  
 27 ACCCCTGATTACCTGTCACCCGTAATCCGCCCGGTGTCAA  
 CGACCCGG  
 28 GTCGGCACCAACATCCGGATAACGGTGACTGGTGGCTGG  
 TCGTGATTT  
 29 CAATTGCCGCTAGCCCCCGAGTCCCGCACGCTGCGTGGA  
 TTGGACGGG  
 30 CCCGGCCACCGGACCCGGGGGCCTGGGGCCCGAGGTTTT  
 AGAGGTCCG  
 31 CTGAATACCTATGACCCGCAGCCCTAAGTTCCGCGCAAAT  
 GTTTGTGG  
 32 CTCAGCATCTTGCTACTGGGCCGCAGGTCGTAGGTCGCA  
 GGCTGTAGG  
 33 GCTTGCAAATCGCCGGACTCCCGTTCGCCGCCAGTTCTA  
 AGGACTTAA  
 34 ACGATCCTTTGGCCCCGGCCGGAGATCAAGGGCATAGGG  
 CACTGGGTG  
 35 CCTTAAACTCCTAGACCCCGCCGCTTTTAACTGAGAATTG  
 GGGTCAGT  
 36 TATCACCCCTATCTCCTGGCCGAGGATTTTAGGGTCGCGG  
 GTAGCGTG  
 37 CACGCCCAGCTATCCGTTACCCGGTCTTCTGGGGGCGGC  
 AGCAATGTA  
 38 GCTATTGCATCGTGTTTGAATGGGATCTGGGAACTAGGG  
 ATCCGGTA  
 39 TAACCACAGTCTTTACACTAATCTCTGAGTTCCGGCTAAT  
 GATGGCAG  
 40 TGTACTCCTTTTTTTT  
 41 TACTGCCCTTTTTTTT  
 42 CGGAACCCTTTTTTTT  
 43 GGGGCGGGAATCTAGG  
 44 CAGCGCTCCAAGTCCC  
 45 GGGCTGTGGAGCATTG  
 46 GCTTGTCCATCGGCCC  
 47 GGAATGCTGGAAATTG

48 TTTTTTTTGGTTTGTA  
 49 TTTTTTTTGGAAAACG  
 50 TTTTTTTTGGGATACT  
 51 AGCTGCCCAGTATCCC  
 52 ATTCACCCTTTTTTTTTTTTTTTTTTTGGGACTTG  
 53 CACAGCCCTTTTTTTTTTTTTTTTTTTGGGCGGAT  
 54 AGGCCCCCTTTTTTTTTTTTTTTTTTTGGGCCGAT  
 55 ACATTCTTTGGTCTCCGGGCAGTATGCGGAGC  
 56 TTGCAGCCTACAAACCGGAGCACAGGGCTCCG  
 57 ACGTCTACCGTTTTTCCGGATATCGGGTATCGG  
 58 CCCTGGCACCTAGATTTACGGGTGACAGGTAA  
 59 CCTTGGGTGCCCCGCAGGACAAGCAGCGTGCG  
 60 CGTTATCCCAATGCTCGGGCTGCGGGTCATAG  
 61 TTAGCCATCTGACTCCGTAAGCCGTTGAGGGA  
 62 CTCAGAACCCTGCTCAGGTATTTATGGATATT  
 63 TTCGACTTTTCGCCTAGGCTAAATGTAAAAAA  
 64 CTCGGCCATCCGCTGTAGGATGTATGTAGTAC  
 65 ACCAGCCACCAGTCACTCAGGGGTCCAGAAGA  
 66 CCATTCCACGGACCTCGGACTCGGGGGCTAGC  
 67 TCACATTTACCGGCCACGTAGTATAGGAAAC  
 68 CATTGTCATACGGCAGTAAAGTGTATAAAGC  
 69 CTTGACTTTCATTTTTTGGTTCAGGTGACCGAA  
 70 TTAACATCAATCACCGCCGGGTAAACGGATAGC  
 71 CCGCGACCCTAAAATCGGCAATTGGATACGTA  
 72 CATCTCACAAATCACGAGATTAGTGTAAGAC  
 73 TATGTCTCATGACCTCATGAGTTGTATGGTAT  
 74 CCAAGTTCTTTATGCCGGGCTGGGAGCCGCGG  
 75 GTCTTGGCCTGACCTGGATGTAAAGTGACGGA  
 76 GTACCTCGCATCCTGCATGGTTGAGTGAACGA  
 77 TGTGTCCACATTCAATGTGAGATGCAGGTTGC  
 78 ATCCGCGCTACGTATCGGCAGGAGCCAACGGT  
 79 TTCGCGTGCCACACGTACGCATGGCGTCGGGT  
 80 CAAACGCCTTGTGTCTGCGCGGTGTGTATTGA  
 81 CTTCCGATCGCCCGTAAATAGTGGTACGAAGT  
 82 CCGCTTCCTTTTTTTTTTTTTTTTTTGTGCTTGC  
 83 TTGACACCCTTTTTTTTTTTTTTTTTTGGTTCGGA  
 84 ACGCGGCCTTTTTTTTTTTTTTTTTTGGTGAGGA  
 85 CCGCCTCCTTTTTTTTTTTTTTTTTTGGAGCAAG  
 86 TCGATCTCTTTTTTTTTTTTTTTTTTGGGACAAA  
 87 ATTTGCGCTTTTTTTTTTTTTTTTTTGAGGACAT  
 88 GCCACGACGCAAGCACGTATTATGGCGAAGAT  
 89 GGCTCAGCTCCGAACCGGAAGGGCTATGATAA  
 90 CATATCCCTCCTCACCGGAAGCGGGAGGATGG  
 91 CATCCGTCTTTGTCCCGGAGGCGGGTGCGAGA

92 ATTATCCTATGTCCTCGGCCGCGTGAGTTAGA  
 93 TAACTATTACAATACCGAGATCGAGGTCTTAG  
 94 CTCATTTCTTATCATAGGGATATGGAAACTAG  
 95 GTACCGTCATCTTCGCGGAATTAAACCGGGGT  
 96 AATTAGATCCGGGTCGAGGATAATGGATGTTG  
 97 TACTACCTCCATCCTCGACGGATGAGTATATT  
 98 CCACAGATTCTAACTCAATAGTTAATGTCAGA  
 99 ATCCACGCTCTCGCACTGGCCGGGACGAAGGC  
 100 GATCCCGTATCGTAATGTCGTGGCATTACGAT  
 101 AACCCTTTACCCCGGTAGGTAGTAGTTGAAAG  
 102 TTAAATATCTAGTTTTCATCTAATTGGTAGGGT  
 103 ATTTTCGTGAATATACTATCTGTGGGGCAGATG  
 104 CCCCCTGCGCCTTCGTGTTGTGAAGTTCGAGC  
 105 AGCCCGTTTCTGACATCGGAATCAACAAGTCA  
 106 TTATTCTTCTTTCAACACGGGATCGGGCACAG  
 107 TGCCGCCACCCTACCATGTGACAAGGTTTGA  
 108 CGCATCTACATCTGCCATATTTAAGTTTTAG  
 109 CGTCCGTACCCGTCCAAAAGGGTTGGAGATAG  
 110 GGACTCTAGCTCGAACCACGAAATAGAAAGCA  
 111 ATTAGCCGTGACTTGTGTGCCGACAATGCAGT  
 112 TCCCTGCGCTGTGCCCAAAGGCTGGATAGAGA  
 113 GCTTAGCTTCAAACCTTAGGCGTAGTGTGGTG  
 114 CCTCTACCCTGAAAACAAGAATAAGGTATGGG  
 115 CCAGCACCTGCTTTCTTACGGACGCTGACGTA  
 116 TTACAGCTACTGCATTTAGATGCGGGCGCGAG  
 117 TCGTGCCTTGGTCCCATAGAGTCCAGGGCAAG  
 118 CGCTACAACACCACACGGTAGAGGAAGAGAGG  
 119 TCAACCATTCTCTATCGGGTGATAGTGATTAA  
 120 ATATAACGTACATTGCAGCTGTAAATTGAATG  
 121 CGATTACTCCCATAACCGGTGCTGGTGACGAGG  
 122 CGATCATGCTCGCGCCAGGCACGAGAACGTGG  
 123 CTCCTGCCTACGTCAGGCAATAGCAAACGAAT  
 124 AACTCCACTTCTACTCTTGTAGCGAGGCAACG  
 125 CATTTATCTTAATCACAGTAATCGCTGCGAAA  
 126 TACTTCCACCTCTCTTCGTTATATGCGATGTC  
 127 GCACTCGCCCTCGTCACATGATCGCGGAGACA  
 128 CAATATGTATTCGTTTAAACATGGGCTCGGGTT  
 129 GTTCAGACCCACGTTCTTGCGGATACAAGAGC

---

**Tables S4.** Probe DNA sequences for making **Cuboid1**

| DNA strand        | Sequence (5'→3')                                                   |
|-------------------|--------------------------------------------------------------------|
| <b>Probe1B-1</b>  | TTTTTTTTTTTCGCAGGTGGAGTTTTTTTTTTTATCCTTA<br>TCAAT                  |
| <b>Probe1B-2</b>  | TTTTTTTTTTGTCTCCGTGGAAGTATTTTTTTTTTATCCTTA<br>TCAAT                |
| <b>Probe1B-3</b>  | TTTTTTTTTAACCCGAGGCGAGTGCTTTTTTTTTTATCCTT<br>ATCAAT                |
| <b>Probe1B-4</b>  | TTTTTTTTTGACATCGCGCCAAGACTTTTTTTTTTATCCTTA<br>TCAAT                |
| <b>Probe1B-5</b>  | TTTTTTTTTACCGTTGGGATAAATGTTTTTTTTTATCCTTA<br>TCAAT                 |
| <b>Probe1B-6</b>  | TTTTTTTTTGCTCTTGTTGGACACATTTTTTTTTTATCCTTA<br>TCAAT                |
| <b>Probe1B-7</b>  | ATCCGCAACTGCCATCGACGAATGACGTGTGGCACGCG<br>AATTTTTTTTTTATCCTTATCAAT |
| <b>Probe1B-8</b>  | CCCATGTTCTTGCCCTAAGTCAAGAGACACAAGGCGTTT<br>GTTTTTTTTTATCCTTATCAAT  |
| <b>Probe1B-9</b>  | CCCTAGTTCCTCAGATCTTGCAAGCTACGGGCGATCGGAA<br>GTTTTTTTTTATCCTTATCAAT |
| <b>Probe1B-10</b> | TTTTTTTTTCGTTACAGAGACATATTTTTTTTTTATCCTTA<br>TCAAT                 |
| <b>Probe1B-11</b> | TTTTTTTTTCGTTGCCTGAACTTGGTTTTTTTTTATCCTTA<br>TCAAT                 |
| <b>Probe1B-12</b> | TTTTTTTTTCCGTCACGTTTAAGGTTTTTTTTTATCCTTA<br>TCAAT                  |
| <b>Probe1B-13</b> | TTTTTTTTTACGCTACCGAGGTACTTTTTTTTTTATCCTTA<br>TCAAT                 |
| <b>Probe1B-14</b> | TTTTTTTTTGCAACCTGTGGGCGTGTTTTTTTTTATCCTTA<br>TCAAT                 |
| <b>Probe1B-15</b> | TTTTTTTTTACCGGATGCGCGGATTTTTTTTTTATCCTTA<br>TCAAT                  |
| <b>Probe1B-16</b> | TTTTTTTTTACTTCGTAAACATATTGTTTTTTTTTATCCTTAT<br>CAAT                |
| <b>Probe1B-17</b> | TTTTTTTTTCAATACAGTCTGAACTTTTTTTTTTATCCTTA<br>TCAAT                 |
| <b>Probe1B-18</b> | TTTTTTTTTACCCGACGTGTGGTTATTTTTTTTTTATCCTTA<br>TCAAT                |

**Tables S5.** Probe DNA sequences for making **Cuboid2**

| DNA strand       | Sequence (5'→3')                                                     |
|------------------|----------------------------------------------------------------------|
| <b>Probe2-1</b>  | TTTTTTTTTTTCGCAGGTGGAGTTTTTTTTTTTTTAACTATTC<br>CTA                   |
| <b>Probe2-2</b>  | TTTTTTTTTGTCTCCGTGGAAGTATTTTTTTTTTTAACTATTC<br>CTA                   |
| <b>Probe2-3</b>  | TTTTTTTTTAACCCGAGGCGAGTGCTTTTTTTTTTTAACTATT<br>CCTA                  |
| <b>Probe2-4</b>  | TTTTTTTTTGACATCGCGCCAAGACTTTTTTTTTTTAACTATT<br>CCTA                  |
| <b>Probe2-5</b>  | TTTTTTTTTACCGTTGGGATAAATGTTTTTTTTTTTAACTATTC<br>CTA                  |
| <b>Probe2-6</b>  | TTTTTTTTTGCTCTTGTTGGACACATTTTTTTTTTTAACTATTC<br>CTA                  |
| <b>Probe2-7</b>  | ATCCGCAACTGCCATCGACGAATGACGTGTGGCACGCGAA<br>TTTTTTTTTTTTTAACTATTCCTA |
| <b>Probe2-8</b>  | CCCATGTTCTTGCCCTAAGTCAAGAGACACAAGGCGTTTG<br>TTTTTTTTTTTTTAACTATTCCTA |
| <b>Probe2-9</b>  | CCCTAGTTCCCAGATCTTGCAAGCTACGGGCGATCGGAAG<br>TTTTTTTTTTTTTAACTATTCCTA |
| <b>Probe2-10</b> | TTTTTTTTTCGTTACGAGACATATTTTTTTTTTTTAACTATTC<br>CTA                   |
| <b>Probe2-11</b> | TTTTTTTTTCGTTGCCTGAACTTGGTTTTTTTTTTTTTAACTATTC<br>CTA                |
| <b>Probe2-12</b> | TTTTTTTTTCCGTCACGTTTAAGGTTTTTTTTTTTTTAACTATTC<br>CTA                 |
| <b>Probe2-13</b> | TTTTTTTTTCACGCTACCGAGGTACTTTTTTTTTTTTAACTATT<br>CCTA                 |
| <b>Probe2-14</b> | TTTTTTTTTGCAACCTGTGGGCGTGTTTTTTTTTTTTTAACTATT<br>CCTA                |
| <b>Probe2-15</b> | TTTTTTTTTACCGGATGCGCGGATTTTTTTTTTTTTTAACTATTC<br>CTA                 |
| <b>Probe2-16</b> | TTTTTTTTTACTTCGTAACATATTGTTTTTTTTTTTTTAACTATTC<br>CTA                |
| <b>Probe2-17</b> | TTTTTTTTTCAATACAGTCTGAACTTTTTTTTTTTTTTAACTATTC<br>CTA                |
| <b>Probe2-18</b> | TTTTTTTTTACCCGACGTGTGGTTATTTTTTTTTTTTTTAACTATTC<br>CTA               |

### 3. Preparation of self-assembled DNA nanostructure

**Design of DNA nanostructure.** The 6H (helices)/6H/64BP (base pairs) nanostructure (**Cuboid1** and **Cuboid2**) was designed according to published methods developed previously,<sup>S1</sup> assisted by program Sequin<sup>S2</sup> (**Cuboid1**: DNA strands from Tables S3 and S4; **Cuboid2**: DNA strands from Tables S3 and S5). The 6H/6H/64BP nanostructure is a 6H by 6H by 64BP cuboid and 15 nm × 15 nm × 21.5 nm in size, with the addition of 8nt (nucleotides) repeat T at the head and tail of each helix to enhance its stability except for the **Probe1**- or **Probe2**-linking 18 helices (with a 10nt repeat T linker at the tail).

**Preparation of DNA nanostructure.** 147 DNA strands were mixed and freeze-dried. The dried DNA strand mixture was dissolved in 0.5 × TE buffer (5 mM Tris, 1 mM EDTA, pH 8.0) supplemented with 40 mM MgCl<sub>2</sub> to a final concentration of 200 nM per strand. The strand mixture was then annealed in a PCR thermocycler by a fast linear cooling step from 90 °C to 61 °C over 2.5 h, and subsequently from 60 °C to 24 °C over 74 h.

**Purification of DNA nanostructure.** Annealed samples were loaded onto 2% agarose gel in 0.5 × TBE buffer (44.6 mM Tris, 44.6 mM boric acid, 1 mM EDTA, pH 8.0) supplemented with 11 mM MgCl<sub>2</sub> and 0.5 µg/mL ethidium bromide. The gel was subjected to electrophoresis at 80 volts for 100 min in an ice water bath. Then, the target gel bands were visualized with ultraviolet light and excised. The excised bands were cut into small pieces and transferred into a Freeze 'N Squeeze column and the column was frozen at -20 °C for 5 min, then centrifuged at 7000 g for 5 min. Samples that were extracted through the column were collected and freeze-dried. The freeze-dried nanostructure was dissolved with water and the concentration of nanostructure was determined according to A<sub>260</sub> prior to use.

**Transmission electron microscopy (TEM) imaging.** Unpurified or purified samples (2.5 µL) were loaded on a glass slide, and a carbon-coated TEM grid was placed on top of the samples for 2 min. The grid was then stained with 2% aqueous uranyl formate solution containing 25 mM NaOH for 2 min. The stained grid was washed

with water twice. Imaging was performed using a JEOL JEM-1011 operated at 100 kV.

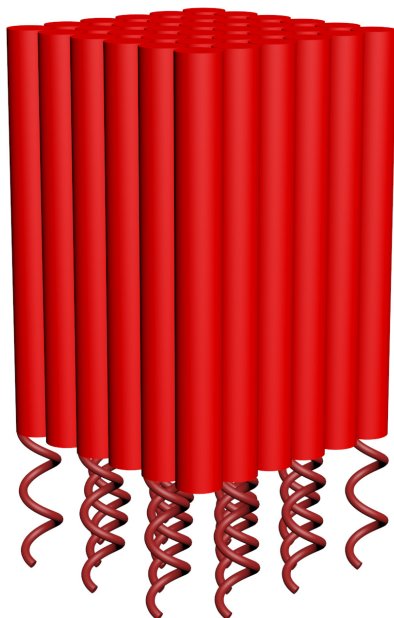

**Fig. S1** 3D model of the nanostructure 6H/6H/64BP.

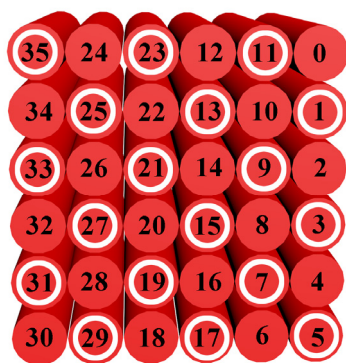

**Fig. S2** Locations of the 18 helices containing **Probe1** or **Probe2**. The 18 helices have been marked with white circles.

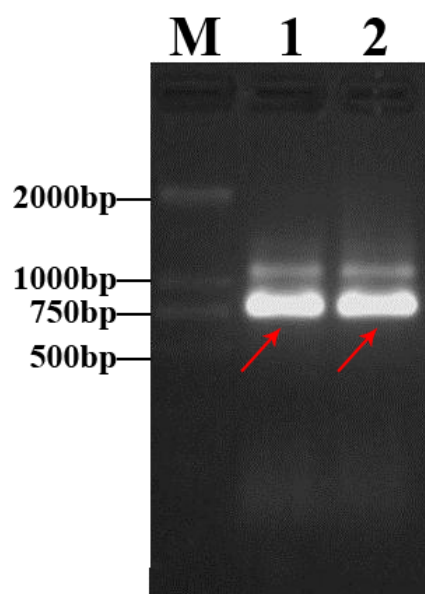

**Fig. S3** Agarose gel electrophoresis diagram of the annealed **Cuboid1** and **Cuboid2**. Lane M: DL2000 DNA marker; lane 1: annealed **Cuboid1**; lane 2: annealed **Cuboid2**. The bands marked in red represent self-assembled DNA nanostructures.

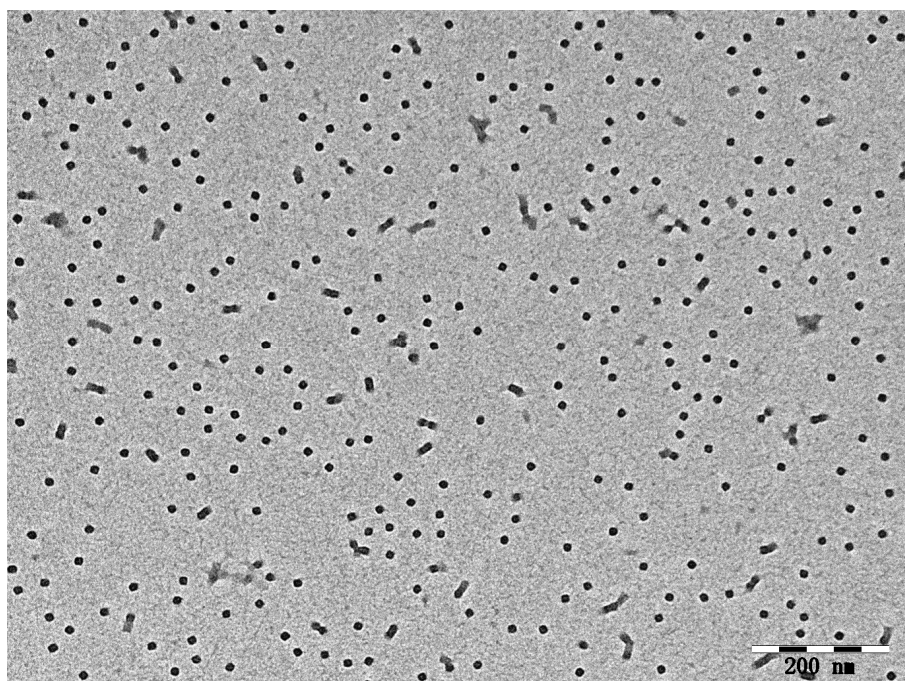

**Fig. S4** TEM image of the annealed **Cuboid1**.

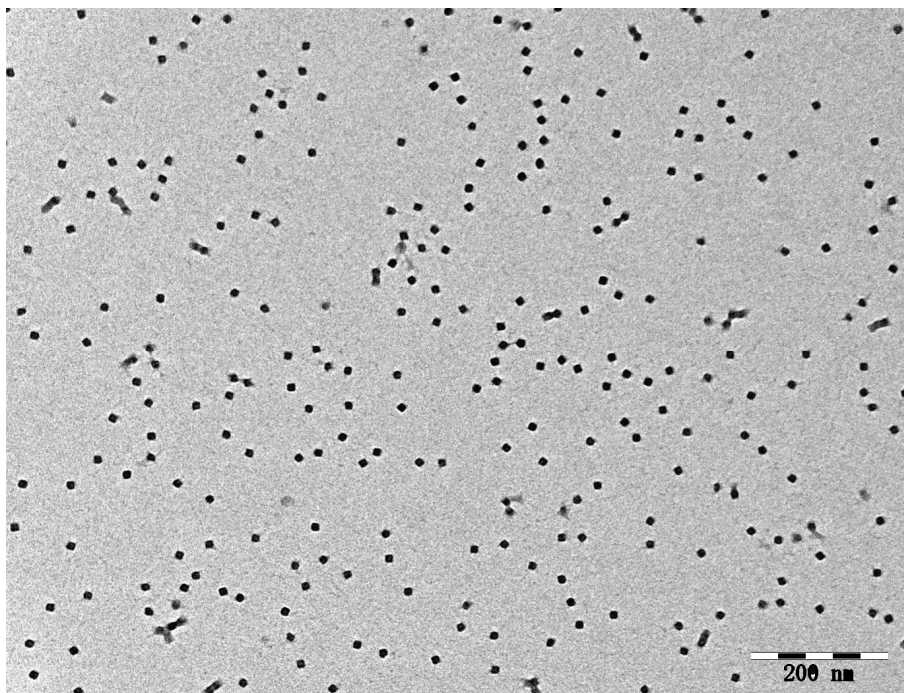

**Fig. S5** TEM image of the purified **Cuboid1** as extracted from the band marked in the lane 1 of Fig. S3.

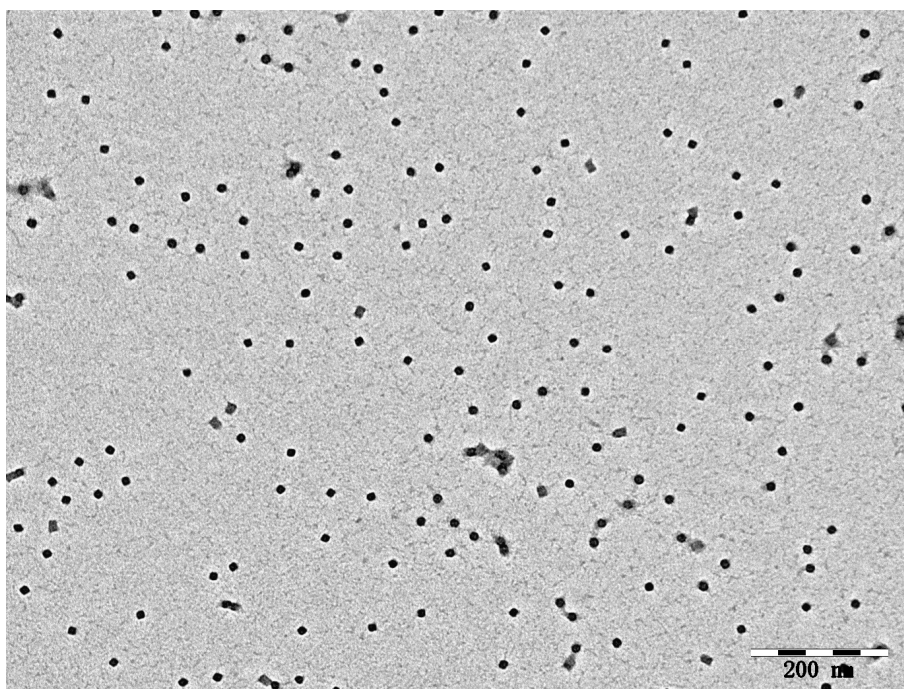

**Fig. S6** TEM image of the annealed **Cuboid2**.

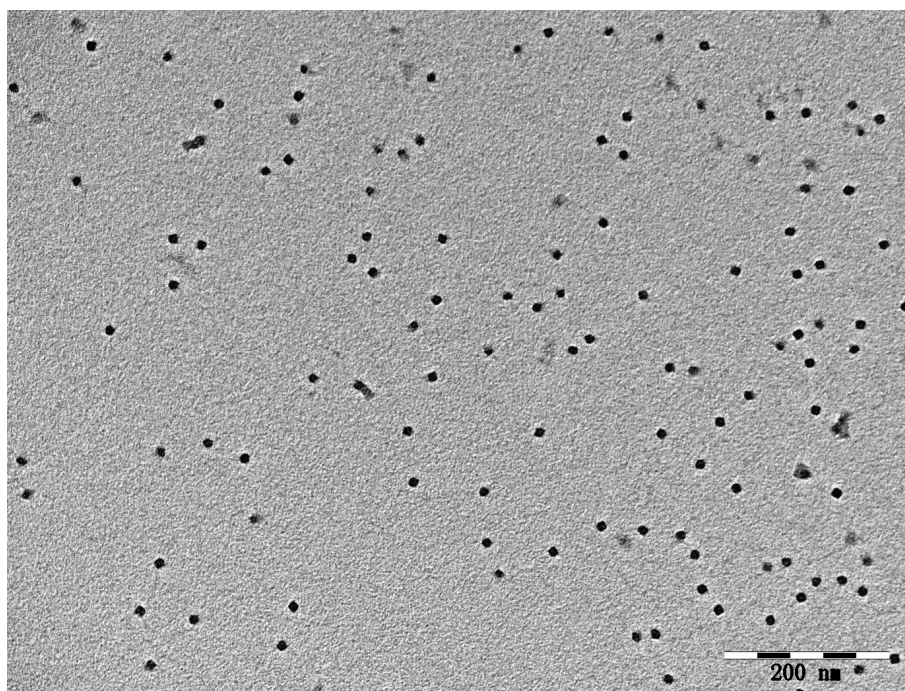

**Fig. S7** TEM image of the purified **Cuboid2** as extracted from the band marked in the lane 2 of Fig. S3.

#### 4. Stability of Cuboid1

Annealed **Cuboid1** (6  $\mu$ L) was separately challenged with 54  $\mu$ L of buffer solution A, B, and C. Buffer solution A: 0.5  $\times$  TE buffer supplemented with 40 mM  $\text{MgCl}_2$ . Buffer solution B: equal portions of 0.3 M PBS solution (0.3 M NaCl, 10 mM phosphate buffer, pH 7.0) and 5  $\times$  TBE buffer supplemented with 110 mM  $\text{MgCl}_2$ . Buffer solution C: 5  $\times$  TBE buffer supplemented with 55 mM  $\text{MgCl}_2$ . The diluted **Cuboid1** (60  $\mu$ L, in buffer A, B, and C) was divided into two equal portions, each of which (30  $\mu$ L) was placed at 4  $^{\circ}\text{C}$  and 37  $^{\circ}\text{C}$  for 12 h, and then 6  $\mu$ L of 6  $\times$  loading buffer was placed in each solution. The mixture was loaded onto 2% native agarose gel in 0.5  $\times$  TBE buffer supplemented with 11 mM  $\text{MgCl}_2$  and 5  $\mu\text{g/mL}$  ethidium bromide. The gel was subjected to electrophoresis at 80 volts for 60 min in an ice water bath.

Annealed **Cuboid1** (3  $\mu$ L) was separately challenged with 27  $\mu$ L of buffer solution B, C, and D. Buffer solution D: equal portions of 0.5  $\times$  TE buffer supplemented with 40 mM  $\text{MgCl}_2$  and 5  $\times$  TBE buffer supplemented with 110 mM  $\text{MgCl}_2$ . The diluted **Cuboid1** (30  $\mu$ L, in buffer B, C, and D) was placed at 25  $^{\circ}\text{C}$  for 12 h, and then 6  $\mu$ L of 6  $\times$  loading buffer was placed in each solution. The mixture was loaded onto 2% native agarose gel in 0.5  $\times$  TBE buffer (pH 8.0) supplemented with 11 mM  $\text{MgCl}_2$  and 5  $\mu\text{g/mL}$  ethidium bromide. The gel was subjected to electrophoresis at 80 volts for 60 min in an ice water bath.

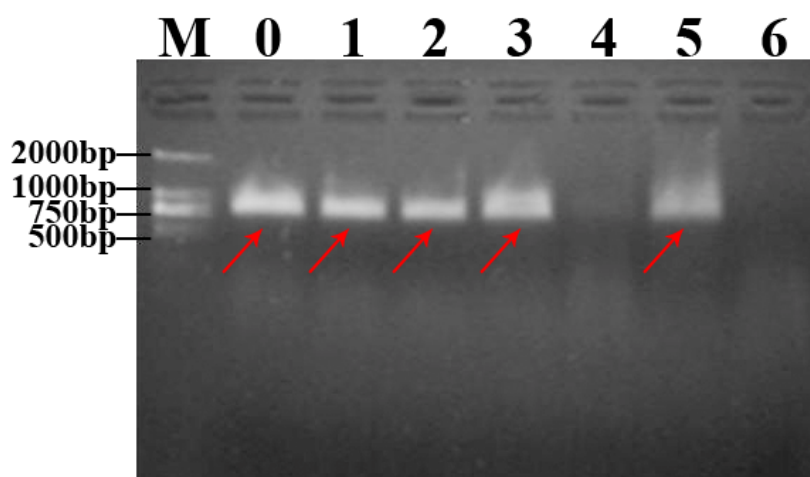

**Fig. S8** Stability of **Cuboid1** in buffer solution A, B, and C at 4 °C and 37 °C. Agarose gel electrophoresis diagram showing stability of **Cuboid1** in buffer solution A, B, and C at 4 °C and 37 °C after 12 h. Lane M: DL2000 DNA marker; lane 0: annealed **Cuboid1**; lane 1: annealed **Cuboid1** in buffer solution A at 4 °C; lane 2: annealed **Cuboid1** in buffer solution A at 37 °C; lane 3: annealed **Cuboid1** in buffer solution B at 4 °C; lane 4: annealed **Cuboid1** in buffer solution B at 37 °C; lane 5: annealed **Cuboid1** in buffer solution C at 4 °C; lane 6: annealed **Cuboid1** in buffer solution C at 37 °C. The bands marked in red represent **Cuboid1**.

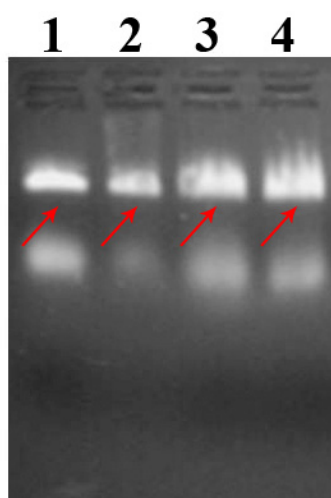

**Fig. S9** Stability of **Cuboid1** in buffer solution B, C, and D at 25 °C. Agarose gel electrophoresis diagram showing stability of **Cuboid1** in buffer solution B, C and D at 25 °C after 12 h. Lane 1: annealed **Cuboid1**; lane 2: annealed **Cuboid1** in buffer solution B at 25 °C; lane 3: annealed **Cuboid1** in buffer solution C at 25 °C; lane 4: annealed **Cuboid1** in buffer solution D at 25 °C. The bands marked in red represent **Cuboid1**.

## 5. Preparation of DNA-modified glass slide

A glass slide was kept in a Piranha solution (hydrogen peroxide:concentrated sulfuric acid = 3:7, v/v) at 90 °C for 2 h. The glass slide was washed with copious amount of water and then placed in a mixture of hydrogen peroxide:ammonia solution:water (1:1:5, v/v/v) at 75 °C for 30 min. The glass slide was again washed with water and then placed in a mixture of hydrogen peroxide:hydrochloric acid:water (1:1:5, v/v/v) at 75 °C for 30 min. After this the glass slide was washed and incubated in an aqueous solution of EDAS (1% EDAS, v/v, 1 mM acetic acid) at room temperature for 30 min. After being washed with water, the EDAS-modified glass slide was N<sub>2</sub>-dried and then baked at 120 °C for 30 min. After being cooled to room temperature, the glass slide was immersed overnight in 5 mM DMSO solution of SMCC at a temperature of approximately or slightly above 25 °C. The glass slide was washed with copious amount of ethanol and water, and then dried by N<sub>2</sub>, and then immersed in a mixture of DMF:pyridine:hexanoic anhydride (4:1:1, v/v/v) at 4 °C for 2 h. The SMCC-modified glass slide was washed with ethanol and water, and then N<sub>2</sub>-dried. Then 0.1 M PBS solution (0.1 M NaCl, 10 mM phosphate buffer, pH 7.0) of **Capture1** (10 μM, 3 μL for each spot) was spotted onto surface of the SMCC-modified glass slide and the reaction was allowed to proceed at 37 °C for 8 h in a humidity chamber. After being washed with water and dried with N<sub>2</sub>, the glass slide was immersed in an ethanol solution of 1 mM 1-hexanethiol at room temperature for 12 h. Finally the glass slide was washed with ethanol and water, and then N<sub>2</sub>-dried. The modification of **Capture2** and **RCA1** was performed in an analogous manner.

## 6. Detection of DNA1 with Cuboid1

A 0.3 M PBS solution (pH 7.0, containing 0.01 wt% SDS, 1.5  $\mu$ L) of **DNA1** was spotted onto a **Capture1**-modified glass slide. Then a 5  $\times$  TBE buffer solution (1.5  $\mu$ L) supplemented with 110 mM MgCl<sub>2</sub> of **Cuboid1** (100 nM) was added and the solution was thoroughly mixed. The hybridization process was performed at 25 °C for 12 h in a humidity chamber and then each spot on the glass slide was washed once with 50  $\mu$ L of 1 M PBN (1 M NaNO<sub>3</sub>, 10 mM phosphate buffer, pH 7.0) supplemented with 11 mM MgCl<sub>2</sub> and 0.05 wt% SDS, followed by another three times wash with 50  $\mu$ L of pure 1 M PBN supplemented with 11 mM MgCl<sub>2</sub>, and then the glass slide was placed in an oven at 40 °C for 4 min for the removal of water on the spots.

The image was recorded using a Canon DIGITAL IXUS 950IS digital camera. For image acquisition, the glass slide was intentionally suspended at an angle of 45 degrees in the air with the black photography backdrop placed away from the glass slide. The visible light source was positioned at the lateral upper side of the glass slide surface and the digital camera was placed in parallel with the glass slide. The image acquisition was performed in a high-quality (3264  $\times$  2448 pixels), lossy compression jpeg format. The utility of this format has enabled consistent, reproducible, and high-quality recording of macroscopic image under our experimental condition. The area of each salt spot on the glass slide in the image was calculated with the ImageJ software. The image was cut to the same size and the image type was changed from RGB color to 8-bit before the calculation.

## 7. Contact angle measurement

A 0.3 M PBS solution (pH 7.0, containing 0.01 wt% SDS, 4.5  $\mu$ L) containing no DNA or **DNA1** (100 nM) was respectively spotted onto a **Capture1**-modified glass slide. Then a  $5 \times$  TBE buffer solution (4.5  $\mu$ L) supplemented with 110 mM  $\text{MgCl}_2$  of **Cuboid1** (100 nM) was added and the solution was thoroughly mixed. The hybridization process was performed at 25  $^{\circ}\text{C}$  for 12 h in a humidity chamber and then each spot on the glass slide was washed with 50  $\mu$ L of 1 M PBN supplemented with 11 mM  $\text{MgCl}_2$  and 0.05 wt% SDS, followed by another two times wash with 50  $\mu$ L of pure 1 M PBN supplemented with 11 mM  $\text{MgCl}_2$ , and finally each spot was washed with 50  $\mu$ L of water, and then  $\text{N}_2$ -dried. A 1 M PBN solution (3  $\mu$ L) supplemented with 11 mM  $\text{MgCl}_2$  was dropped onto the glass slide and contact angle was measured.

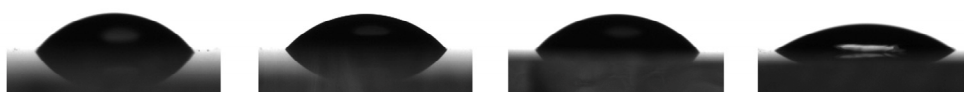

**Fig. S10** Contact angle measured at different locations of the glass slide. Macroscopic image of salt solution droplet showing the contact angle at different locations of the glass slide. From left to right: **Capture1**-free area, **Capture1**-modified area, **Capture1**-modified area after hybridization in the absence of **DNA1**, **Capture1**-modified area after hybridization in the presence of **DNA1**.

**Table S6.** Contact angle at different locations of the glass slide. (ref. Fig. S10)

|                                 | <b>Capture1</b> -<br>free area | <b>Capture1</b> -<br>modified area | <b>Capture1</b> -<br>modified area<br>after<br>hybridization<br>in the absence<br>of <b>DNA1</b> | <b>Capture1</b> -<br>modified area<br>after<br>hybridization<br>in the presence<br>of <b>DNA1</b> |
|---------------------------------|--------------------------------|------------------------------------|--------------------------------------------------------------------------------------------------|---------------------------------------------------------------------------------------------------|
| Contact<br>angle ( $^{\circ}$ ) | 53.4                           | 49.0                               | 49.8                                                                                             | 34.2                                                                                              |

## 8. Attempted detection of DNA1 with Probe1A or Probe1B mixture

A 0.3 M PBS solution (pH 7.0, containing 0.01 wt% SDS, 1.5  $\mu$ L) of **DNA1** was spotted onto a **Capture1**-modified glass slide. Then a 5  $\times$  TBE buffer solution (1.5  $\mu$ L) supplemented with 110 mM MgCl<sub>2</sub> of **Probe1A** (1.8  $\mu$ M) or **Probe1B** mixture (100 nM per **Probe-1B** strand; for sequence information, see Table S4) was added and the solution was thoroughly mixed. The hybridization process was performed at 25 °C for 12 h in a humidity chamber and then each spot on the glass slide was washed once with 50  $\mu$ L of 1 M PBN supplemented with 11 mM MgCl<sub>2</sub> and 0.05 wt% SDS, followed by another three or four times wash with 50  $\mu$ L of pure 1 M PBN supplemented with 11 mM MgCl<sub>2</sub>, and then the glass slide was placed in an oven at 40 °C for 4 min for the removal of water on the spots.

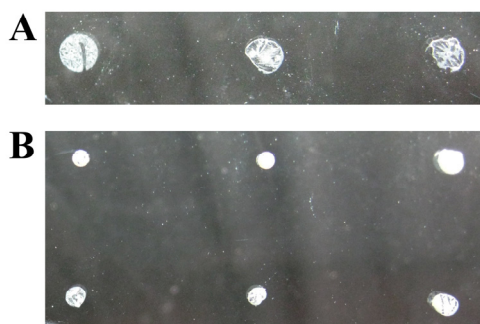

**Fig. S11** Attempted DNA detection with **Probe1A**. A) Macroscopic image of a spot array on a glass slide for the attempted detection of **DNA1** with **Probe1A**. **DNA1** concentration (from left to right): 50 nM, 5 nM, and 0 M. The concentration of **Probe1A** is 900 nM. The glass slide was washed three times with 50  $\mu$ L of pure 1 M PBN supplemented with 11 mM  $\text{MgCl}_2$ . B) Macroscopic image of a spot array on a glass slide for the detection of **DNA1** with **Probe1A**. **DNA1** concentration (from left to right, from top to bottom): 500 nM, 100 nM, 50 nM, 10 nM, 5 nM, and 0 M. The concentration of **Probe1A** is 900 nM. The glass slide was four times washed with 50  $\mu$ L of pure 1 M PBN supplemented with 11 mM  $\text{MgCl}_2$ .

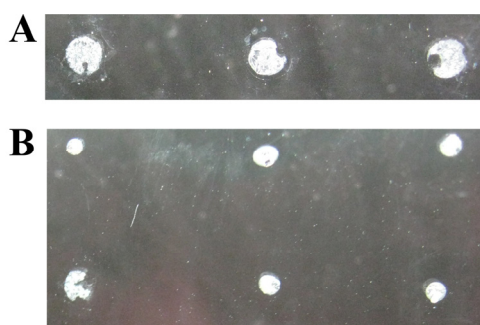

**Fig. S12** Attempted DNA detection with **Probe1B** mixture. A) Macroscopic image of a spot array on a glass slide for the detection of **DNA1** with **Probe1B** mixture. **DNA1** concentration (from left to right): 5 nM, 0 M, and 0 M. The concentration of **Probe1B** mixture is 50 nM (50 nM per **Probe1B** strand). The glass slide was washed three times with 50  $\mu$ L of pure 1 M PBN supplemented with 11 mM  $\text{MgCl}_2$ . B) Macroscopic image of a spot array on a glass slide for the detection of **DNA1** with **Probe1B** mixture. **DNA1** concentration (from left to right, from top to bottom): 100 nM, 50 nM, 25 nM, 10 nM, 5 nM, and 0 M. The concentration of **Probe1B** mixture is 50 nM (50 nM per **Probe1B** strand). The glass slide was washed four times with 50  $\mu$ L of pure 1 M PBN supplemented with 11 mM  $\text{MgCl}_2$ .

## 9. Differentiation of DNA1 from DNA strands with single-base mismatches

A 75 mM PBS solution (75 mM NaCl, 2.5 mM phosphate buffer, containing 0.005 wt% SDS, pH 7.0, 3  $\mu$ L) of either **DNA1** or a DNA strand with single-base mismatch (**DNA1-SBM1**, **DNA1-SBM2**, **DNA1-SBM3**, **DNA1-SBM4**) (50 nM) was spotted onto a **Capture1**-modified glass slide. The hybridization process was performed at 25 °C for 1 h in a humidity chamber and then each spot on the glass slide was washed with 50  $\mu$ L of 60 mM PBS solution (60 mM NaCl, 2 mM phosphate buffer, pH 7.0) three times and then dried by N<sub>2</sub>. A 0.5  $\times$  TBE buffer (1.5  $\mu$ L) supplemented with 11 mM MgCl<sub>2</sub> of **Cuboid1** (20 nM) was spotted onto the dried spot and the hybridization process was performed at 25 °C for 1 h in the humidity chamber. Each spot was washed with 50  $\mu$ L of 7.5 mM PBN (7.5 mM NaNO<sub>3</sub>, 0.75 mM phosphate buffer, pH 7.0) supplemented with 1.25 mM MgCl<sub>2</sub> and 0.05 wt% SDS, followed by another three times wash with 50  $\mu$ L of pure 7.5 mM PBN (pH 7.0) supplemented with 1.25 mM MgCl<sub>2</sub>. Finally, each spot was washed with 50  $\mu$ L of pure 1 M PBN supplemented with 11 mM MgCl<sub>2</sub>, and then the glass slide was placed in an oven at 40 °C for 4 min for the removal of water on the spots.

## 10. Two-target detection

In a typical two-target detection experiment, a glass slide was spotted with 4 spots each of **Capture1** (top row) and **Capture2** (bottom row). The four columns of spots were each tested for a sample containing no DNA target, containing **DNA1** (100 nM), containing **DNA2** (100 nM), and containing both **DNA1** (100 nM) and **DNA2** (100 nM), respectively. The solutions of **Cuboid1** and **Cuboid2** were added to the 4 spots on the top and bottom rows, respectively. The hybridization was performed in an analogous manner (volume and concentration of each component except for DNA in the hybridization solution, duration of hybridization, concentration of each component in the wash buffer, and wash step) as that for the detection of single target.

## 11. RNA detection

**RNA1** powder was dissolved with DEPC-treated 0.3 M PBS (0.01 wt% SDS, pH 7.0) and diluted to different concentrations. The freeze-dried **Cuboid1** was dissolved with DEPC-treated water and diluted with DEPC-treated  $5 \times$  TBE buffer solution (pH 8.0) supplemented with 110 mM  $\text{MgCl}_2$  to 100 nM.

The **Capture1**-modified glass slide was washed with DEPC-treated water and dried by  $\text{N}_2$ . A DEPC-treated 0.3M PBS solution (pH 7.0, containing 0.01 wt% SDS, 1.5  $\mu\text{L}$ ) of **RNA1** was spotted onto the **Capture1**-modified glass slide. And then a DEPC-treated  $5 \times$  TBE buffer solution (pH 8.0, 1.5  $\mu\text{L}$ ) supplemented with 110 mM  $\text{MgCl}_2$  of **Cuboid1** (100 nM) was added and the solution was thoroughly mixed. The hybridization process was performed at 25 °C for 4 h in a humidity chamber and then each spot on the glass slide was washed with 50  $\mu\text{L}$  of 1 M PBN supplemented with 11 mM  $\text{MgCl}_2$  and 0.05 wt% SDS, followed by another three times wash with 50  $\mu\text{L}$  of pure 1 M PBN supplemented with 11 mM  $\text{MgCl}_2$ , and then the glass slide was placed in an oven at 40 °C for 4 min for the removal of water on the spots.

## 12. DNA detection through LCR-rolling circle amplification (LCR-RCA) protocol

In a typical DNA detection experiment, a 20  $\mu$ L LCR solution containing **PDNA1** (1  $\mu$ M), **AMPDNA1A** (1  $\mu$ M), **AMPDNA1B** (1  $\mu$ M), *Taq* DNA ligase (1 U/ $\mu$ L), *Taq* DNA ligase reaction buffer, and **DNA1** (various concentrations) was subjected to a thermal cycling treatment: 65  $^{\circ}$ C, 5 min/20 cycles of (65  $^{\circ}$ C, 30 sec/25  $^{\circ}$ C, 2 min/45  $^{\circ}$ C, 3 min)/65  $^{\circ}$ C, 7 min. Then the LCR mixture (20  $\mu$ L) containing **CPDNA1** was subjected to enzymatic digestion in a final volume of 23.2  $\mu$ L solution (exonuclease I 0.2 U/ $\mu$ L, exonuclease III 1.6 U/ $\mu$ L, 0.5  $\mu$ L each of the two 10  $\times$  nuclease reaction buffer) at 37  $^{\circ}$ C for 1 h for the removal of single-strand DNA, **DNA1**, **PDNA1**, **AMPDNA1A**, **AMPDNA1B**, and ligation product from **AMPDNA1A** and **AMPDNA1B**. The exonucleases were heat inactivated by incubation at 80  $^{\circ}$ C for 15 min.

A RCA reaction solution was prepared through the mixing of following solutions: 10 mM dNTPs (2  $\mu$ L), 10  $\times$   $\phi$ 29 DNA polymerase reaction buffer (2  $\mu$ L), and  $\phi$ 29 DNA polymerase (1  $\mu$ L). The RCA reaction solution (0.65  $\mu$ L) was added to LCR mixture (3  $\mu$ L) containing **CPDNA1** and the solution was thoroughly mixed. The above mixture (3  $\mu$ L) was spotted onto the **RCA1**-modified glass slide. The RCA reaction process was allowed to perform at 37  $^{\circ}$ C for 5 h in a humidity chamber and then each spot on the glass slide was washed with 50  $\mu$ L of 1 M PBN supplemented with 11 mM  $\text{MgCl}_2$  and 0.05 wt% SDS, followed by another six times wash with 50  $\mu$ L of pure 1 M PBN supplemented with 11 mM  $\text{MgCl}_2$ , and then the glass slide was placed in an oven at 40  $^{\circ}$ C for 4 min for the removal of water on the spots.

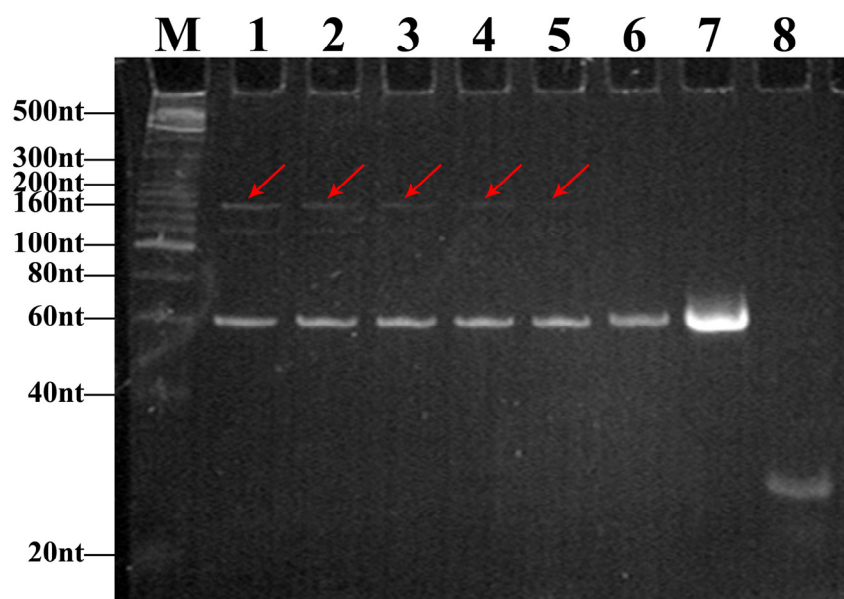

**Fig. S13** Verification of the ligation reaction by *Taq* DNA ligase. Gel electrophoresis diagram showing the ligation of **PDNA1** by *Taq* DNA ligase in the presence of **DNA1**. Lane M: DNA ladder marker; lanes 1 to 6: **DNA1** concentration of 100 nM, 10 nM, 1 nM, 100 pM, 10 pM, 0 M; lane 7: **PDNA1**; lane 8: **DNA1**. The bands marked in red represent the ligation product **CPDNA1**. **PDNA1** (1  $\mu$ M), **AMPDNA1A** (1  $\mu$ M), and **AMPDNA1B** (1  $\mu$ M) were ligated by *Taq* DNA ligase (1 U/ $\mu$ L) in the presence of **DNA1** (various concentrations) under LCR condition: 65  $^{\circ}$ C, 5 min/20 cycles of (65  $^{\circ}$ C, 30 sec/25  $^{\circ}$ C, 2 min/45  $^{\circ}$ C, 3 min)/65  $^{\circ}$ C, 7 min.

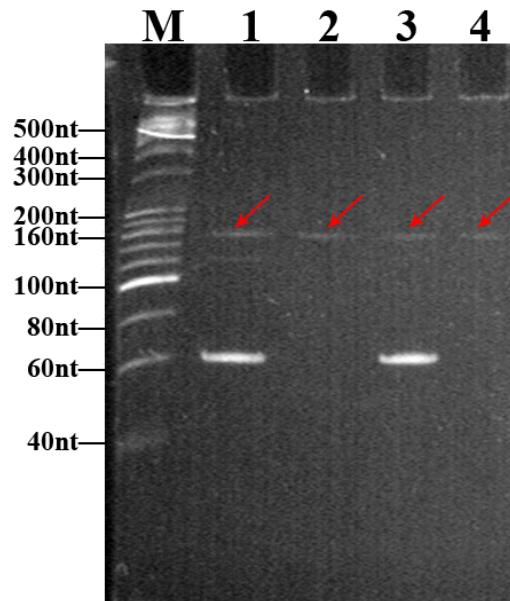

**Fig. S14** Verification of enzyme digestion of exonuclease I and exonuclease III. Gel electrophoresis diagram showing the ligation of **PDNA1** and enzymatic digestion with exonuclease I and exonuclease III. Lane M: DNA ladder marker; lane 1: ligation mixture (concentration of **DNA1** is 100 nM) before enzymatic digestion; lane 2: ligation mixture (concentration of **DNA1** is 100 nM) after enzymatic digestion; lane 3: ligation mixture (concentration of **DNA1** is 10 nM) before enzymatic digestion; lane 4: ligation mixture (concentration of **DNA1** is 10 nM) after enzymatic digestion. The bands marked in red represent the ligation product **CPDNA1**.

### **13. References**

- S1. Y. Ke, L. L. Ong, W. M. Shih, P. Yin, *Science*, 2012, **338**, 1177-1183.
- S2. N. C. Seeman, *J. Biomol. Struct. Dyn.*, 1990, **8**, 573-581.
